# Supplementary material for: A miR-9-5p/FOXO1/CPEB3 Feed-Forward Loop Drives the Progression of Hepatocellular Carcinoma
Source: Cells. 2022 Jul 5;11(13):2116. doi: 10.3390/cells11132116 (PMC9265408; doi:10.3390/cells11132116)
Supplement: Supplementary file 1 [file cells-11-02116-s001.zip › Table S2. Differentially expressed genes and miRNAs.xlsx]

## Sheet: Differentially expressed genes
Gene_id	Tumor_mean	Adjacent_mean	Prob	log2FC	Flag	Type
SEPT5	312.72	69.54	1	2.16896	up	gene
AADAT	295.55	1423.84	1	-2.26831	down	gene
ACSM3	782.17	3197.24	1	-2.03127	down	gene
ADAMTS13	145.84	1213.56	1	-3.05679	down	gene
ADH4	15386.8	88498.7	1	-2.52396	down	gene
ADM2	507	104.56	1	2.27765	up	gene
ADRA1A	108.83	794.12	1	-2.86728	down	gene
ALPK3	592.32	116.46	1	2.34654	up	gene
ANGPTL6	116.43	825.48	1	-2.82577	down	gene
ANKRD55	6.11	59.3	1	-3.27879	down	gene
APOF	1536.75	13708.1	1	-3.15707	down	gene
ARHGAP11A	217	36.04	1	2.59002	up	gene
ASF1B	223.48	31.02	1	2.84888	up	gene
ASPG	714.24	3068.18	1	-2.1029	down	gene
AURKA	456.34	75.54	1	2.5948	up	gene
AURKB	140.82	13.72	1	3.3595	up	gene
AXIN2	415.72	90.12	0.999769	2.20569	up	gene
BCAT2	954.3	225.4	1	2.08196	up	gene
BCO2	150.22	1488.24	1	-3.30846	down	gene
BDKRB2	319.88	71.3	0.99968	2.16556	up	gene
BEX2	146.01	36.2	0.999661	2.01201	up	gene
BIRC5	208.26	11.13	1	4.22586	up	gene
BMP10	2.35	40.74	0.99961	-4.11571	down	gene
BMP5	4.73	37.22	1	-2.97617	down	gene
BMPER	20.97	323.04	1	-3.94531	down	gene
BUB1	191.22	10.85	1	4.13947	up	gene
BUB1B	150.14	10.95	1	3.77731	up	gene
C12orf48	83.42	12.62	1	2.72468	up	gene
C12orf75	430.56	71.12	0.999746	2.59789	up	gene
C14orf68	3356.18	19266.3	1	-2.52119	down	gene
C15orf42	50.78	4.76	1	3.41523	up	gene
C16orf59	118.68	15.21	1	2.96398	up	gene
C16orf75	203.76	49.24	0.999431	2.04897	up	gene
C1QTNF3	751.82	57.8	1	3.70125	up	gene
C5orf30	127.08	30.74	0.998421	2.04755	up	gene
C5orf34	31.76	4.79	1	2.72911	up	gene
C6orf97	305.46	38.62	1	2.98356	up	gene
C7	2035.5	8933.46	1	-2.13384	down	gene
C8orf4	1004.18	4654.5	1	-2.21261	down	gene
C9	7242.4	47168.6	1	-2.70329	down	gene
C9orf100	138.04	23	1	2.58538	up	gene
CA9	1015.88	55.56	0.999994	4.19254	up	gene
CAP2	878.48	160.26	1	2.4546	up	gene
CCBE1	13.62	131.78	0.999916	-3.27433	down	gene
CCL23	5.18	53.36	1	-3.36473	down	gene
CCNB1	494.8	57.1	1	3.11528	up	gene
CCNB2	218.56	15.24	1	3.84209	up	gene
CCNF	196.68	42.64	1	2.20557	up	gene
CD109	432.64	60.16	1	2.84629	up	gene
CD163	692.08	2826.46	1	-2.02999	down	gene
CD200	98.94	21.39	1	2.20962	up	gene
CD34	1301.28	265.14	1	2.29511	up	gene
CD5L	462.35	2743.34	1	-2.56888	down	gene
CDC25A	93.92	22.3	1	2.07439	up	gene
CDC45	132.26	11.75	1	3.49264	up	gene
CDCA3	134.2	12.53	1	3.42093	up	gene
CDCA5	301.76	29.14	1	3.37233	up	gene
CDCA8	216.6	22.38	1	3.27475	up	gene
CDH13	284	35.28	1	3.00897	up	gene
CDH19	17.25	69.86	0.998214	-2.01787	down	gene
CDKN2C	517.74	98.96	1	2.38731	up	gene
CDKN3	183.58	9.27	1	4.3077	up	gene
CDT1	278.8	28.12	1	3.30956	up	gene
CENPA	65.04	3.76	1	4.11252	up	gene
CENPF	627.26	41.08	1	3.93256	up	gene
CENPH	104.1	25.86	1	2.00918	up	gene
CENPK	51.54	6.86	1	2.90941	up	gene
CENPL	130.44	26.86	1	2.27986	up	gene
CENPM	149.7	12.31	1	3.60417	up	gene
CEP55	78.74	10.38	1	2.92329	up	gene
CETP	213.28	1067.3	0.999653	-2.32315	down	gene
CFP	132.94	1206.82	1	-3.18236	down	gene
CKAP2L	97.57	8	1	3.60837	up	gene
CKB	2390.74	391.68	1	2.60971	up	gene
CLEC12A	11.11	45.65	0.999606	-2.03876	down	gene
CLEC1B	27.02	570.06	1	-4.39901	down	gene
CLEC4G	121.69	2207.18	1	-4.18092	down	gene
CLEC4M	49.53	1098.24	1	-4.47075	down	gene
CNDP1	183.27	1965.98	1	-3.42321	down	gene
COL4A1	7242.6	1672.64	1	2.11438	up	gene
COL4A2	8125.9	2026.14	1	2.00379	up	gene
COL4A5	237.13	49.22	0.998599	2.26836	up	gene
COL6A6	4.18	45.4	1	-3.44112	down	gene
COLEC10	72.84	923.44	1	-3.66422	down	gene
COX7A1	613.9	84.48	0.994867	2.86132	up	gene
CPEB3	324.2	1316.4	1	-2.02164	down	gene
CRHBP	143.83	2439.76	1	-4.0843	down	gene
CRIP3	221.44	37.52	1	2.56118	up	gene
CRYAB	1714.6	149.44	1	3.52023	up	gene
CSPG4	414.9	76.72	1	2.43509	up	gene
CTNND2	258.16	37.2	0.999286	2.79489	up	gene
CTSK	1110.14	152.64	0.997201	2.86254	up	gene
CXCL12	1276.46	7934.72	1	-2.63603	down	gene
CXCL14	143.5	1290.28	0.999992	-3.16856	down	gene
CXCL2	604	2775.14	1	-2.19994	down	gene
CXCR2P1	51.77	234.24	0.999783	-2.1778	down	gene
CXorf36	327	60.08	1	2.44433	up	gene
CYP17A1	2509.71	63.78	1	5.29827	up	gene
CYP1A2	3354.12	22712.9	1	-2.7595	down	gene
CYP1B1	2696.6	343.38	0.99903	2.97326	up	gene
CYP2B6	3384.4	19612.8	1	-2.53483	down	gene
CYP2C8	9341.66	51661.5	1	-2.46734	down	gene
CYP2C9	9715.28	40470.7	1	-2.05855	down	gene
CYP39A1	512.19	2210.24	1	-2.10945	down	gene
CYP3A43	45.79	271.64	1	-2.56859	down	gene
CYP4A11	12328.8	49713.5	1	-2.01161	down	gene
DACH1	13.6	70.02	0.999999	-2.36416	down	gene
DBH	83.1	1201.02	1	-3.85327	down	gene
DCDC2	1311.86	292.3	0.999033	2.16609	up	gene
DCN	1899.32	9520.94	1	-2.32562	down	gene
DIRAS3	37.89	252.38	1	-2.73571	down	gene
DNASE1L3	491.78	3296.1	1	-2.74468	down	gene
DPT	157.58	662.2	0.999561	-2.07118	down	gene
DSCC1	96.76	20.58	1	2.23317	up	gene
ECM1	262.78	1908.46	1	-2.86048	down	gene
ECT2	364.1	58.12	1	2.64723	up	gene
EFNB3	15.09	73.6	0.999782	-2.28611	down	gene
ELOVL7	369.91	78.04	0.998397	2.24489	up	gene
EPHB1	18.27	77.44	0.999682	-2.0836	down	gene
EPPK1	219.91	36.16	1	2.60445	up	gene
EPR1	292.88	24.87	1	3.55783	up	gene
ERCC6L	41.4	4.3	1	3.26722	up	gene
EXO1	110.06	7.13	1	3.94824	up	gene
EZH2	267.92	45.64	1	2.55343	up	gene
FABP3	855.74	154.38	0.994517	2.47069	up	gene
FABP4	651.4	54.24	0.999961	3.58611	up	gene
FAM111B	232.84	33.59	1	2.79324	up	gene
FAM180A	46.72	206.44	0.999759	-2.14361	down	gene
FAM65C	42.35	271.86	1	-2.68243	down	gene
FAM83D	431.88	63.66	1	2.76217	up	gene
FAM83F	16.47	107.66	0.999801	-2.70857	down	gene
FAM99A	216.44	872.1	0.999804	-2.01053	down	gene
FANCI	355.1	64.26	1	2.46623	up	gene
FBP1	7133.6	29129	1	-2.02975	down	gene
FBXL18	448.02	85.46	1	2.39024	up	gene
FBXO32	247.42	43.38	0.999583	2.51186	up	gene
FCGR2B	135.48	703.3	1	-2.37606	down	gene
FCGR2C	34.78	151.53	0.999685	-2.12327	down	gene
FCN2	96.7	1694.02	1	-4.13079	down	gene
FCN3	353.78	4347.94	1	-3.61941	down	gene
FGF13	249.04	40.44	1	2.62252	up	gene
FITM1	59.69	240.6	0.999709	-2.01108	down	gene
FLNC	747	52.22	1	3.83843	up	gene
FLVCR1	176.58	30.5	1	2.53344	up	gene
FOLH1B	61.22	363.02	1	-2.56797	down	gene
FRAS1	318.05	71.04	0.998902	2.16255	up	gene
FREM2	88.46	392.52	0.998657	-2.14967	down	gene
G6PD	990.66	182.38	1	2.44144	up	gene
GABRD	112.48	3.27	1	5.10423	up	gene
GABRE	263.66	51.84	1	2.34654	up	gene
GAL3ST1	510.61	80.8	0.999858	2.65979	up	gene
GBA3	762.02	3422.46	1	-2.16713	down	gene
GDF2	28.13	492.28	0.999931	-4.1293	down	gene
GHR	1876.8	7663.38	1	-2.02971	down	gene
GINS1	201.98	32.68	1	2.62773	up	gene
GJC1	136.56	23.2	1	2.55734	up	gene
GLUL	111473	22728.9	1	2.2941	up	gene
GMNN	987.44	233.34	1	2.08126	up	gene
GNAO1	179.8	1019.94	1	-2.50402	down	gene
GPM6A	40.21	319.1	0.999894	-2.98838	down	gene
GPR128	92.57	610.74	1	-2.72194	down	gene
GPR182	9.07	115.14	1	-3.66614	down	gene
GPR97	214.93	35.08	0.994363	2.61515	up	gene
GPRIN1	118.74	18.74	1	2.66361	up	gene
GPSM1	365.48	85.1	0.999989	2.10256	up	gene
GYS2	1245.85	5293.62	1	-2.08712	down	gene
HAO2	1340.35	6881.76	1	-2.36017	down	gene
HGF	73.92	356.24	0.999685	-2.26881	down	gene
HIST2H2AA3	2583.22	618.14	0.999453	2.06316	up	gene
HIST2H4A	530.88	110.68	1	2.26199	up	gene
HMMR	243.08	19.44	1	3.64433	up	gene
HSPB6	5345.98	657.34	0.999854	3.02374	up	gene
IDO2	29.34	140.24	0.999805	-2.25696	down	gene
IGF1	860.62	3539.54	1	-2.04011	down	gene
IGFALS	1037.37	6349.4	1	-2.61369	down	gene
IGJ	314.58	1638.28	1	-2.38068	down	gene
IGSF3	531.16	70	1	2.92372	up	gene
IL1RAP	784.58	3310.74	1	-2.07716	down	gene
IL1RN	1313.84	5890.08	1	-2.1645	down	gene
INMT	283.36	1393.18	1	-2.29767	down	gene
INS-IGF2	421.81	4175.2	1	-3.30718	down	gene
ITGB4	758.52	166.36	0.999067	2.18888	up	gene
ITIH5	1099.7	140.84	0.999571	2.96498	up	gene
ITPKA	183.01	33.16	1	2.46441	up	gene
JAG2	353.4	86.3	1	2.03387	up	gene
JMJD5	515.54	2729.78	1	-2.40463	down	gene
KBTBD11	176.49	741.46	1	-2.07078	down	gene
KCNN2	40.65	523.26	1	-3.6862	down	gene
KCTD17	366.84	89.36	0.999754	2.03745	up	gene
KIAA0101	187.92	31.56	1	2.57395	up	gene
KIF11	209.7	41.8	1	2.32675	up	gene
KIF19	6.64	42.6	1	-2.6816	down	gene
KIF20A	239.82	14.64	1	4.03396	up	gene
KIFC1	328.3	24.17	1	3.76373	up	gene
KNTC1	268.5	60.74	1	2.1442	up	gene
LAMA3	931.1	138.36	1	2.75051	up	gene
LCAT	1045.38	6639.3	1	-2.667	down	gene
LGR5	351.96	66.98	0.999635	2.39361	up	gene
LIFR	353.48	2207.82	1	-2.64292	down	gene
LILRA2	21.52	94.32	1	-2.13189	down	gene
LINGO1	264.42	36.92	1	2.84036	up	gene
LIPE	259.38	33.78	0.997195	2.94083	up	gene
LMOD1	932.22	157.48	0.999144	2.5655	up	gene
LOC388152	161.68	38.52	1	2.06946	up	gene
LOC441869	174.1	35.21	1	2.30586	up	gene
LPA	386.6	3579.62	1	-3.21089	down	gene
LPHN1	454.26	74.2	1	2.61403	up	gene
LRAT	45.51	347.78	1	-2.93392	down	gene
LRRC1	215.78	50.74	0.999608	2.08837	up	gene
LRRC4	14.78	63.9	1	-2.11217	down	gene
LRRC55	8.72	58.58	0.999973	-2.74801	down	gene
LRRN3	6.94	44.62	0.999984	-2.68468	down	gene
LYVE1	194.84	1055.92	0.999985	-2.43814	down	gene
MAD2L1	211.72	40.66	1	2.38048	up	gene
MAP1A	261.88	31.5	0.998308	3.05548	up	gene
MAPK12	306.02	57.94	1	2.40099	up	gene
MARCO	133.62	2879.8	1	-4.42976	down	gene
MCM2	881.74	164.92	1	2.41859	up	gene
MELK	171.68	9.07	1	4.24248	up	gene
MFI2	164.39	38.62	0.996228	2.0897	up	gene
MFSD2A	1190.76	5849.02	1	-2.29631	down	gene
MLF1IP	382.68	70.66	1	2.43717	up	gene
MMP11	664.1	45.88	1	3.85546	up	gene
MOGAT2	146.85	631.54	0.999975	-2.10453	down	gene
MPZ	497.18	50.12	1	3.31031	up	gene
MT1E	2718.16	24218.2	1	-3.15539	down	gene
MT1F	599.24	7530.8	1	-3.6516	down	gene
MT1G	3658.81	41471.9	1	-3.50269	down	gene
MT1H	446.98	4806.3	1	-3.42664	down	gene
MT1X	3547.66	29262.7	1	-3.04412	down	gene
MT2A	13385.2	85021.2	1	-2.66718	down	gene
MTBP	51.3	9.98	1	2.36185	up	gene
MTMR11	315.24	75.88	0.999998	2.05466	up	gene
MYL9	10852.2	1509.42	0.996775	2.84593	up	gene
N4BP3	57.76	12.8	1	2.17393	up	gene
NAT2	186.83	1522.96	1	-3.02708	down	gene
NAV3	128.25	30.98	0.998645	2.04955	up	gene
NBLA00301	24.39	112.02	0.997177	-2.19939	down	gene
NCAPG	311.98	22.78	1	3.77561	up	gene
NCAPH	156.08	14.54	1	3.42419	up	gene
NDC80	173.14	13.45	1	3.68626	up	gene
NDRG4	467.02	34.32	0.997693	3.76636	up	gene
NDST3	2.29	43.8	1	-4.25751	down	gene
NDUFA4L2	718.48	93.18	1	2.94686	up	gene
NEK2	213.25	12.11	1	4.13827	up	gene
NFKBIL2	324.72	72.52	1	2.16275	up	gene
NGFR	280.54	1169.62	1	-2.05976	down	gene
NKD1	715.07	37.78	1	4.24239	up	gene
NNMT	14226	61393.5	1	-2.10956	down	gene
NOTCH3	1548.58	283.72	1	2.44841	up	gene
NOTUM	3168.47	612.02	0.999999	2.37214	up	gene
NPNT	766.98	140.14	0.998877	2.45232	up	gene
NR4A1	1061.44	4467.08	1	-2.07331	down	gene
NT5DC2	609.84	101.24	1	2.59065	up	gene
NTF3	13.93	94.54	0.999836	-2.76273	down	gene
NUSAP1	570.72	119.32	1	2.25795	up	gene
OBSCN	215.38	50.2	0.998527	2.10113	up	gene
OIT3	299.1	2893.04	1	-3.27389	down	gene
OLFML2A	328.88	55.22	1	2.5743	up	gene
OLFML2B	253.84	29.02	1	3.1288	up	gene
OXCT1	180.3	38.54	0.998197	2.22597	up	gene
PAMR1	83.66	341.16	0.999936	-2.02784	down	gene
PAQR4	386.74	95.46	1	2.0184	up	gene
PAQR5	430.19	88.38	0.999503	2.28318	up	gene
PCK1	19063	92137.1	1	-2.27301	down	gene
PDGFA	636.26	156.48	0.999943	2.02364	up	gene
PGF	415.66	94.42	0.996233	2.13824	up	gene
PHLDA1	2341.54	10052.5	1	-2.10203	down	gene
PHYHIPL	456.98	104.1	1	2.13416	up	gene
PITPNM3	29.17	164.44	0.999019	-2.495	down	gene
PKMYT1	163.02	15	1	3.44201	up	gene
PLAC8	25.65	274.78	1	-3.42125	down	gene
PLAC9	503.86	56.74	0.996539	3.15058	up	gene
PLCE1	128.44	26.48	1	2.27812	up	gene
PLCH2	255.83	57.62	0.998587	2.15054	up	gene
PLGLA	11.85	70.66	1	-2.57601	down	gene
PLK1	284.14	21.18	1	3.74583	up	gene
PLVAP	3547.18	386.6	1	3.19776	up	gene
PODXL2	238.62	58.54	0.998625	2.02722	up	gene
PPAP2C	914.37	149.68	1	2.6109	up	gene
PRC1	493.52	50.32	1	3.2939	up	gene
PRKAA2	490.88	103.52	1	2.24546	up	gene
PSMC3IP	45.72	8.38	1	2.4478	up	gene
PTGDS	15047.5	924.06	0.999485	4.02539	up	gene
PTGFR	289.48	48.1	1	2.58935	up	gene
PTH1R	130.9	756.7	0.999707	-2.53126	down	gene
PTK7	325.02	76.64	0.999469	2.08436	up	gene
PTP4A3	835.04	113.28	1	2.88195	up	gene
PTTG1	362.42	27.8	1	3.70451	up	gene
PVALB	4.65	39.38	0.999979	-3.08216	down	gene
PYCR1	848.42	121.2	1	2.80739	up	gene
RAB3D	445.3	99.78	0.999442	2.15796	up	gene
RACGAP1	388.6	68.26	1	2.50917	up	gene
RAD51	74.26	12.76	1	2.54096	up	gene
RASD2	51.72	5.91	1	3.12949	up	gene
RASL12	100.04	19.53	1	2.35681	up	gene
RBP7	378.24	80.12	1	2.23907	up	gene
RCAN1	1529.9	7101.92	1	-2.21477	down	gene
RDH16	4378.56	18974.4	1	-2.11553	down	gene
RECQL4	372.66	49.42	1	2.91469	up	gene
RHBG	1076.97	178.08	0.999646	2.59638	up	gene
RHPN1	164.24	39.74	0.999437	2.04714	up	gene
RND3	1108.26	5086.58	1	-2.1984	down	gene
RNF157	536.96	74.66	1	2.84641	up	gene
RNF165	15.11	78.84	1	-2.38342	down	gene
ROBO1	1999.88	233.08	1	3.10102	up	gene
RPS6KL1	117.44	27.96	1	2.07049	up	gene
RRM2	740.62	90.84	1	3.02733	up	gene
S100A1	326.34	44.36	0.999096	2.87904	up	gene
S100A8	56.9	264.46	0.999739	-2.21655	down	gene
SCGN	412.25	76.06	0.999565	2.43831	up	gene
SCN4A	56.44	10.02	1	2.49384	up	gene
SELM	1241.92	298.32	1	2.05764	up	gene
SEMA5B	124.12	19.62	1	2.66134	up	gene
SFRP1	42.42	215.78	0.99964	-2.34674	down	gene
SFRP5	116.88	654.62	0.999839	-2.48563	down	gene
SGOL2	113.68	20.01	1	2.50619	up	gene
SHBG	726.64	2947.86	0.999999	-2.02036	down	gene
SIGLEC11	18.73	92.94	0.99976	-2.31095	down	gene
SIGLEC7	39.52	169.94	1	-2.10437	down	gene
SILV	3571.5	200.82	0.998196	4.15256	up	gene
SKA3	98	7.55	1	3.69823	up	gene
SLC16A14	519.92	95.54	0.998985	2.44411	up	gene
SLC16A9	320.17	49.74	0.99947	2.68636	up	gene
SLC22A1	5219.92	28679.4	1	-2.45791	down	gene
SLC22A10	527.3	2646.58	1	-2.32743	down	gene
SLC26A6	503.54	78.08	1	2.68908	up	gene
SLC39A4	697.14	170.34	0.998094	2.03303	up	gene
SLC45A4	300	68.26	0.999404	2.13585	up	gene
SLC6A8	1222.4	107.28	1	3.51026	up	gene
SMPD3	42.9	209.64	0.999468	-2.28886	down	gene
SNCG	1811.1	55.6	1	5.02564	up	gene
SOCS2	368.28	1996.34	1	-2.43848	down	gene
SPARCL1	5786.78	673.48	1	3.10305	up	gene
SPC25	78.62	6.07	1	3.69513	up	gene
SRD5A2	370.66	1621.68	1	-2.12932	down	gene
SRPX2	272.02	67.26	0.994144	2.01589	up	gene
ST6GAL2	30.94	125.5	0.998758	-2.02014	down	gene
STAB2	51.77	940.06	1	-4.18256	down	gene
STK39	318.92	63.08	1	2.33794	up	gene
TACC3	592.72	139.54	1	2.08667	up	gene
TCF19	452	71.7	1	2.65628	up	gene
TCTEX1D1	12.38	121.98	1	-3.30056	down	gene
TDGF1	376.59	49.3	1	2.93334	up	gene
TESC	855.98	111.46	1	2.94105	up	gene
THY1	1974.74	292.08	1	2.75723	up	gene
TK1	833.64	180.72	1	2.20567	up	gene
TMEM26	19.65	84.6	0.999624	-2.10613	down	gene
TMEM27	157.24	734.14	0.999992	-2.22309	down	gene
TNFRSF19	280.84	64.56	0.998421	2.12104	up	gene
TNFRSF4	95.78	13.85	1	2.78984	up	gene
TPM2	1453.72	335.38	0.998819	2.11588	up	gene
TPX2	755.16	179.86	1	2.06991	up	gene
TRAIP	76.9	8.63	1	3.15555	up	gene
TRIM16	1178	121.02	1	3.28302	up	gene
TRIM16L	956.3	123.38	1	2.95435	up	gene
TTC36	433.15	2521.86	1	-2.54155	down	gene
TTC9	814.84	186.96	0.999998	2.12379	up	gene
TYRO3	321.66	71.72	0.999006	2.16509	up	gene
UBE2C	292.66	20.51	1	3.83483	up	gene
UBE2T	222.98	20.6	1	3.4362	up	gene
UGT2B11	1074.49	191.5	0.999956	2.48824	up	gene
UROC1	1355.22	5744.46	1	-2.08364	down	gene
USH1C	434.57	45.12	0.999401	3.26775	up	gene
VCAN	1085.88	266.04	0.999965	2.02915	up	gene
VIPR1	104.92	933.8	1	-3.15382	down	gene
VSIG10L	239.1	56.52	0.999708	2.08078	up	gene
WDHD1	84.64	17.86	1	2.24461	up	gene
WDR62	148.5	20.78	1	2.8372	up	gene
WDR76	145.34	25.82	1	2.49287	up	gene
WNT2	9.44	41.95	0.999138	-2.15181	down	gene
ZSWIM5	259.06	48.06	1	2.43038	up	gene
ZWINT	389.7	73.2	1	2.41245	up	gene
FOXM1	543.04	40.18	1	3.75651	up	Transcription factor
MSC	1008.8	82.24	1	3.61666	up	Transcription factor
CREB3L1	292.12	34.2	0.998632	3.09449	up	Transcription factor
FOXS1	68.88	9.42	1	2.87029	up	Transcription factor
SP5	292.5	51.06	1	2.51817	up	Transcription factor
EHF	340.65	81.28	0.999958	2.06732	up	Transcription factor
MESP1	71.5	17.24	1	2.05218	up	Transcription factor
NFATC4	281.86	70.52	0.998795	1.99887	up	Transcription factor
ARID3A	125.26	31.68	0.998599	1.98328	up	Transcription factor
MYBL1	149.66	42.93	0.996964	1.80163	up	Transcription factor
ZFP41	377.74	111.32	1	1.76268	up	Transcription factor
HMGA1	1857.02	568.8	1	1.707	up	Transcription factor
ZNF517	350.12	110.8	0.999999	1.65989	up	Transcription factor
ZNF341	204.62	65	0.998006	1.65444	up	Transcription factor
TEAD2	639.4	206.44	0.999961	1.631	up	Transcription factor
ZBTB12	64.32	20.82	0.999665	1.6273	up	Transcription factor
GLI4	342.76	111.3	0.99968	1.62275	up	Transcription factor
HSF4	161.6	52.93	0.997696	1.61027	up	Transcription factor
SALL2	136.78	45.08	0.998729	1.6013	up	Transcription factor
ETS2	4743.96	14419.4	1	-1.60385	down	Transcription factor
NFIL3	1080.8	3291.16	1	-1.6065	down	Transcription factor
ATF3	1169.7	3567.14	1	-1.60863	down	Transcription factor
IRF8	363.12	1167.48	1	-1.68488	down	Transcription factor
LHX2	23.29	78.6	0.998457	-1.75482	down	Transcription factor
FOXO1	718.46	2446.88	1	-1.76796	down	Transcription factor
ESR1	287.14	1245.88	1	-2.11734	down	Transcription factor
NR4A3	96.94	430.22	0.999734	-2.14991	down	Transcription factor
CSRNP1	853.96	3863.54	1	-2.17768	down	Transcription factor
EGR1	3480.6	16864.7	1	-2.2766	down	Transcription factor
EGR2	89.42	440.14	1	-2.29929	down	Transcription factor
FOS	2266.56	16492.8	1	-2.86326	down	Transcription factor
FOSB	466.58	5595.16	1	-3.58398	down	Transcription factor
Note: The table shows the results of differentially expressed genes, calculated by the R package NOISeq.

## Sheet: Differentially expressed miRNAs
Gene_id	Tumor_mean	Adjacent_mean	Prob	log2FC	Flag
hsa-miR-9-5p	2171	134.56	1	4.01204	up
hsa-miR-183-5p	4796.06	319.56	1	3.90769	up
hsa-miR-182-5p	11685.4	1183.52	1	3.30356	up
hsa-miR-224-5p	132.347	22	1	2.58875	up
hsa-miR-196b-5p	54.449	10.18	1	2.41917	up
hsa-miR-3677-3p	5.55102	1.13	1	2.29643	up
hsa-miR-452-5p	273.204	60.1	1	2.18454	up
hsa-miR-452-3p	10.1429	2.3	1	2.14076	up
hsa-miR-421	4.06122	1.14	1	1.83288	up
hsa-miR-1180-3p	28.8163	9.14	1	1.65662	up
hsa-miR-450a-5p	7.20408	22.3	1	-1.63016	down
hsa-miR-450b-5p	8.85714	27.44	1	-1.63137	down
hsa-miR-139-3p	32.5102	103.36	1	-1.66871	down
hsa-miR-130a-3p	32.9592	118.84	1	-1.85027	down
hsa-miR-424-5p	171.796	648.46	1	-1.91632	down
hsa-miR-139-5p	98.102	382.1	1	-1.9616	down
hsa-miR-144-3p	14.7551	57.96	0.999983	-1.97384	down
Note: The table shows the results of differentially expressed miRNAs, calculated by the R package NOISeq.
